# Supplementary material
Source: PubMed Central journal article supplement (PMC4807492)
Supplement: IAI.01536-15_zii999091643so1.pdf [file IAI.01536-15_zii999091643so1.pdf]

Figure S1

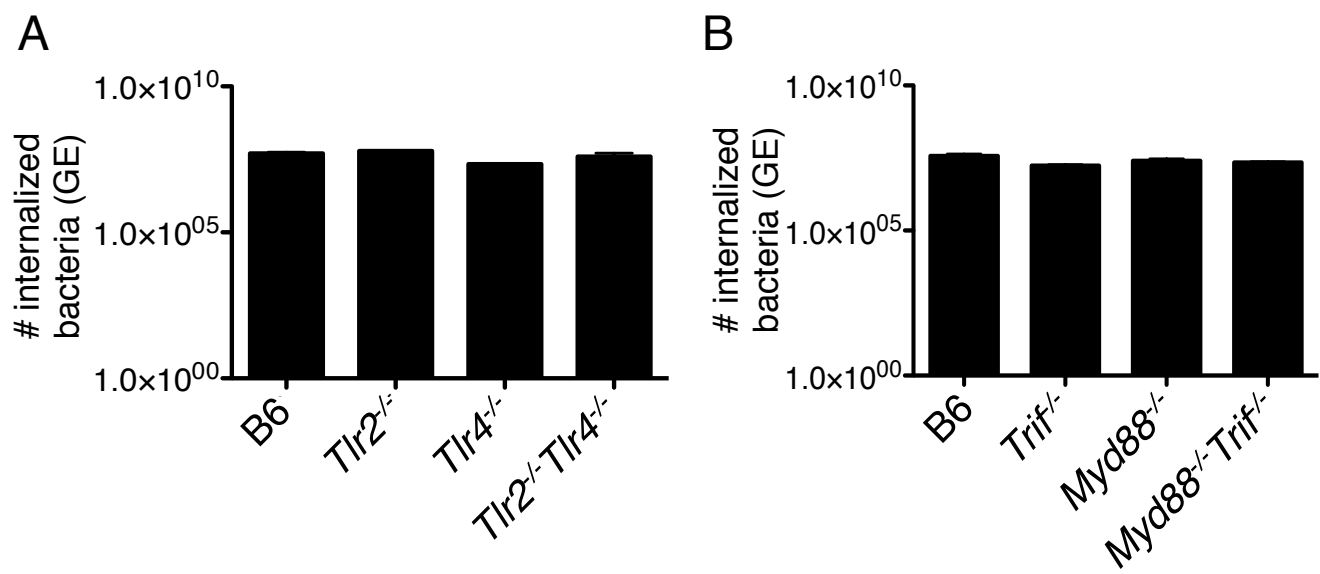

Figure S2

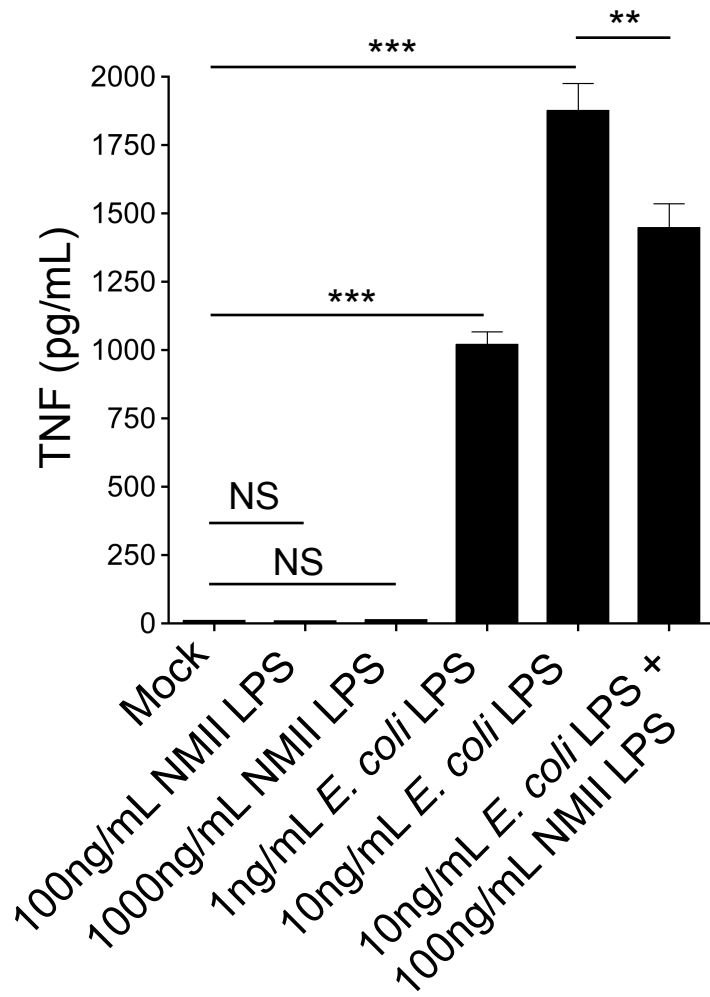

Figure S3

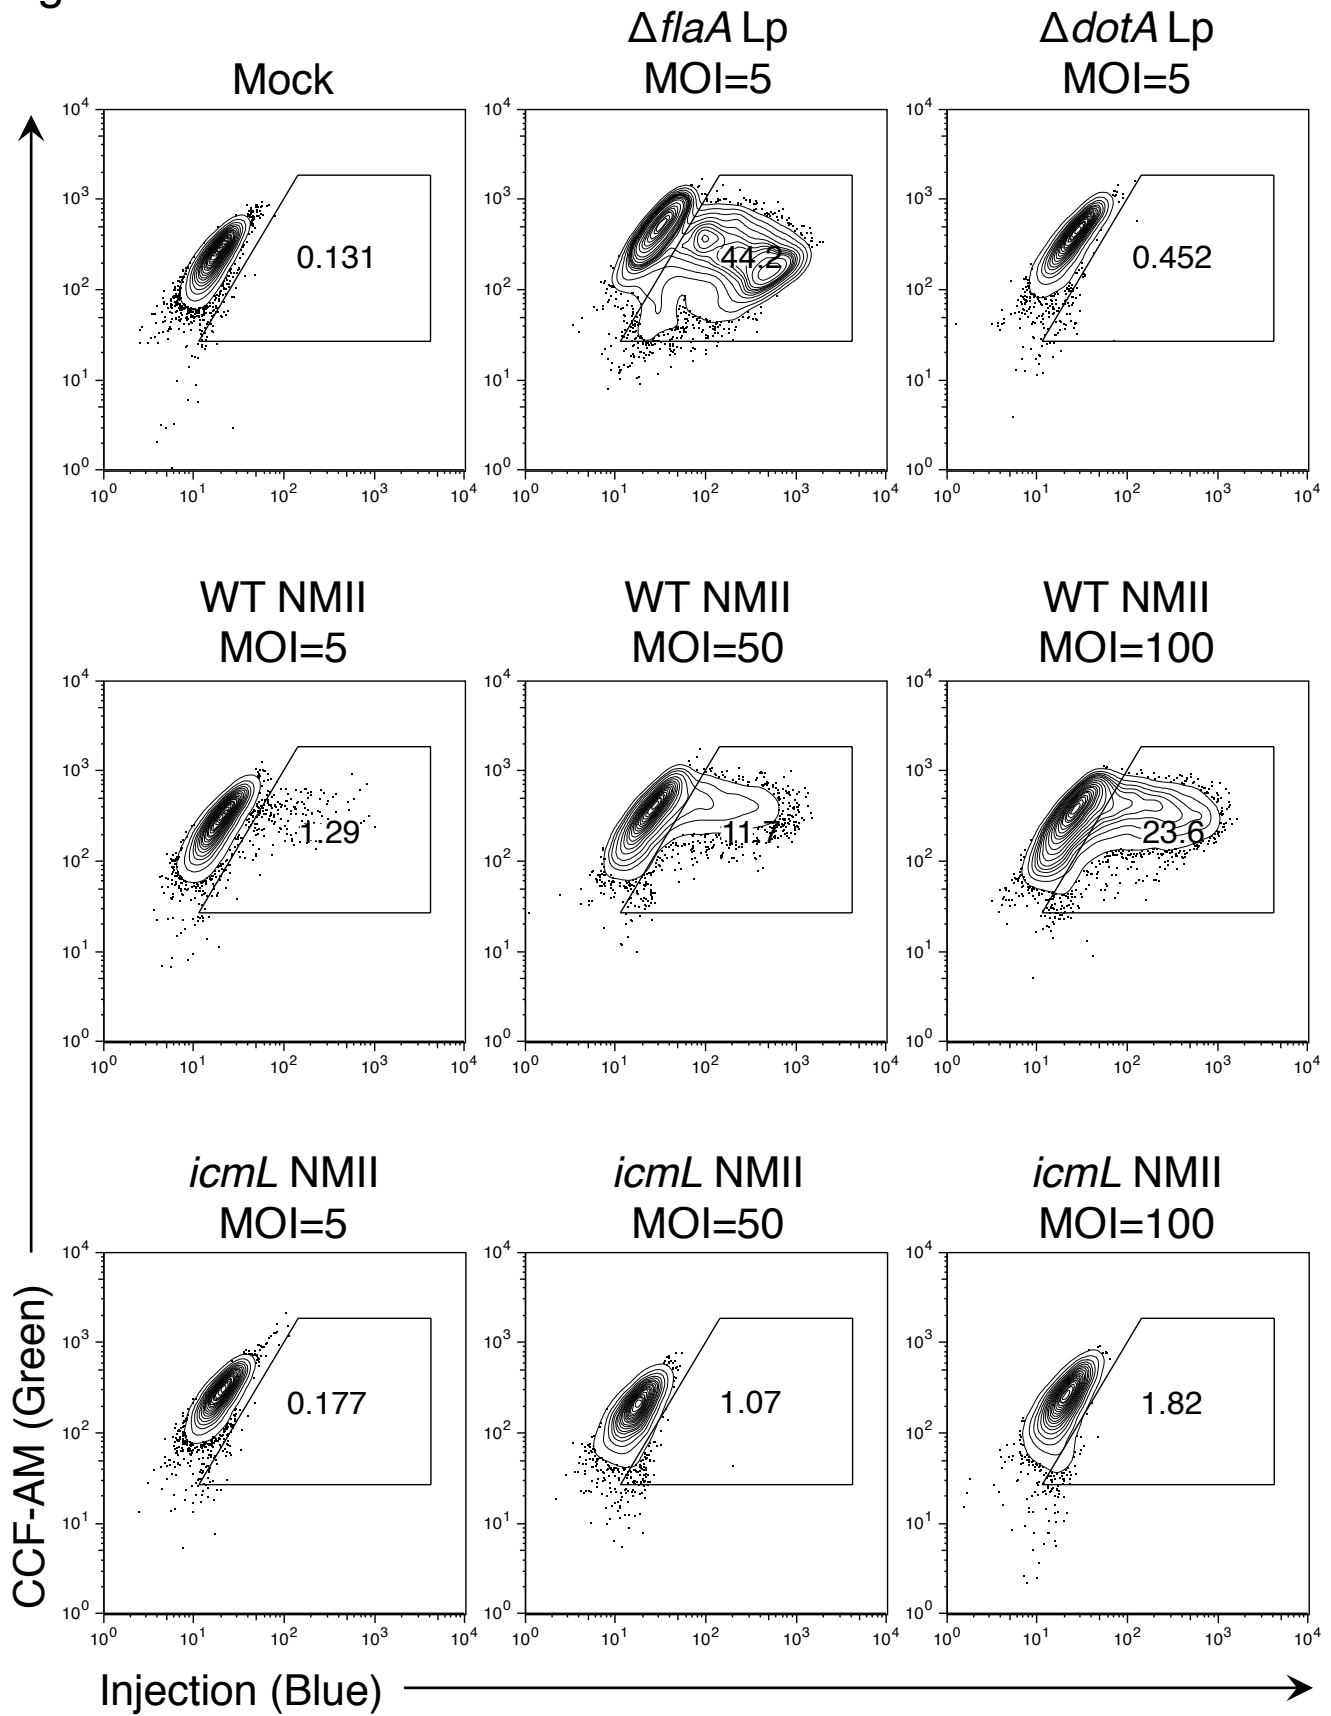

Figure S4

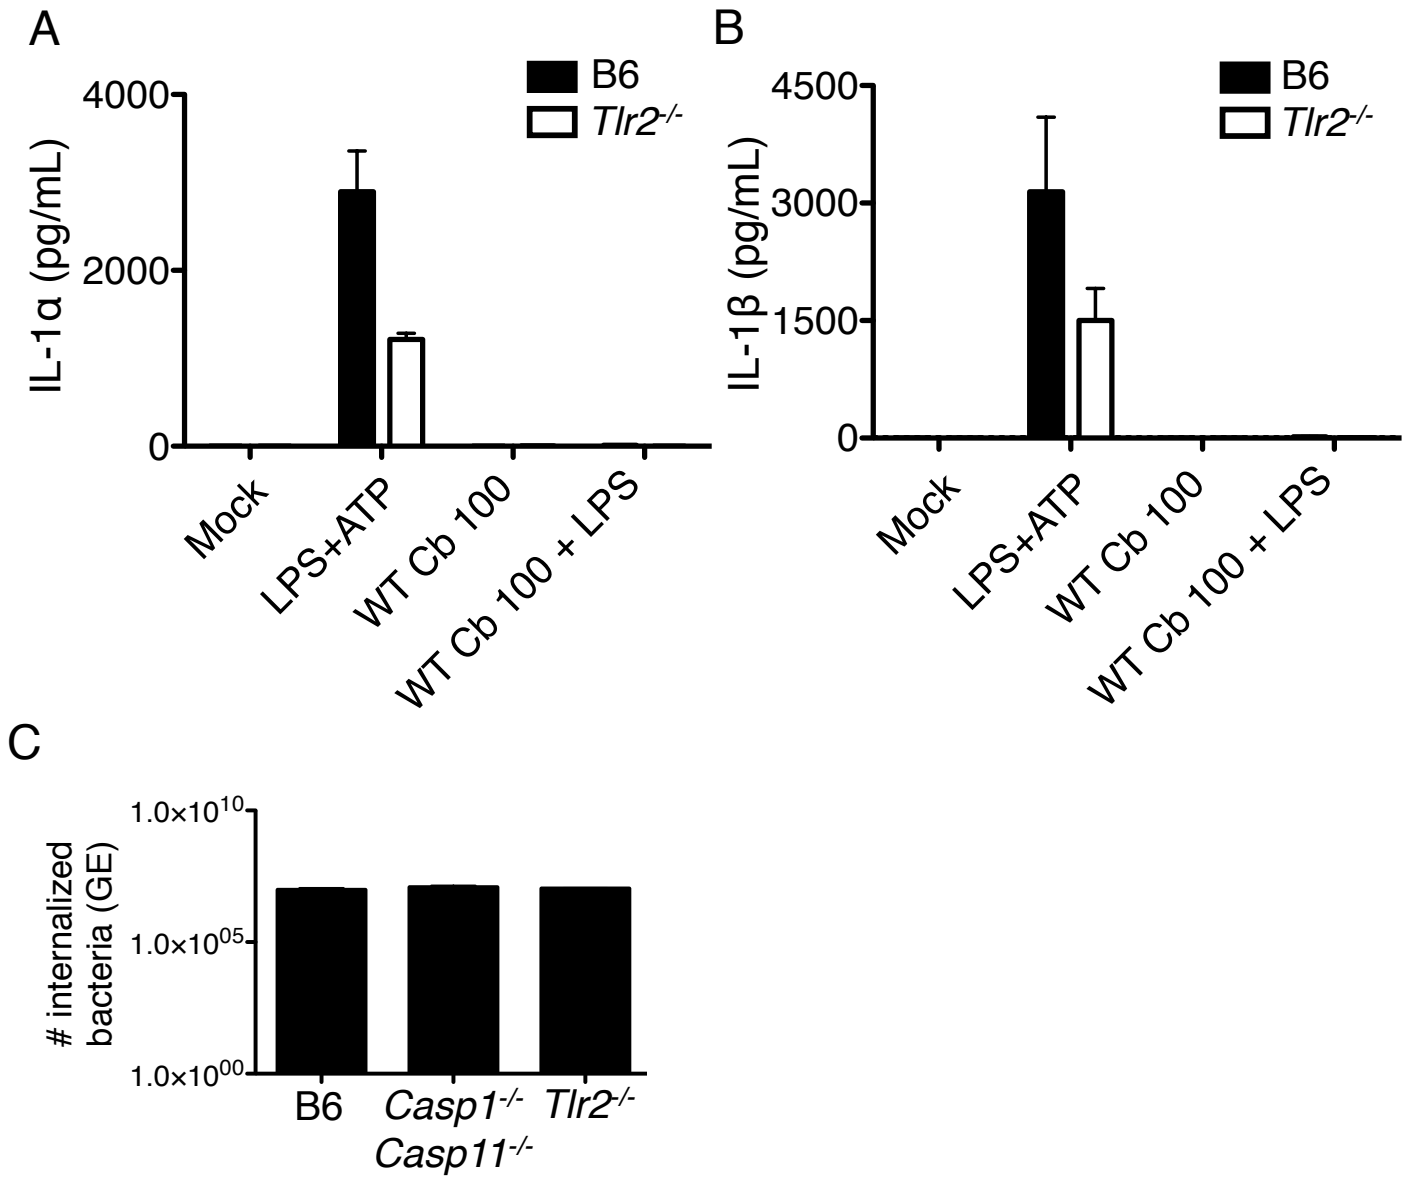

Figure S5

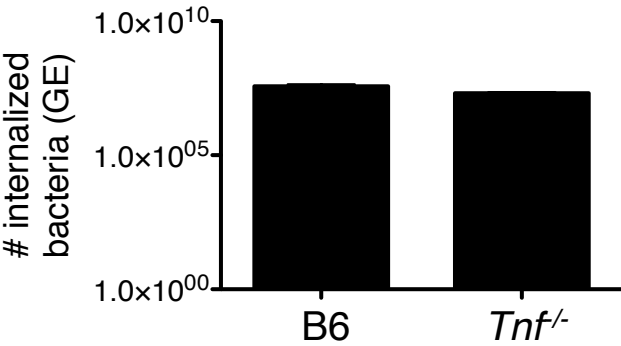

Figure S6

A

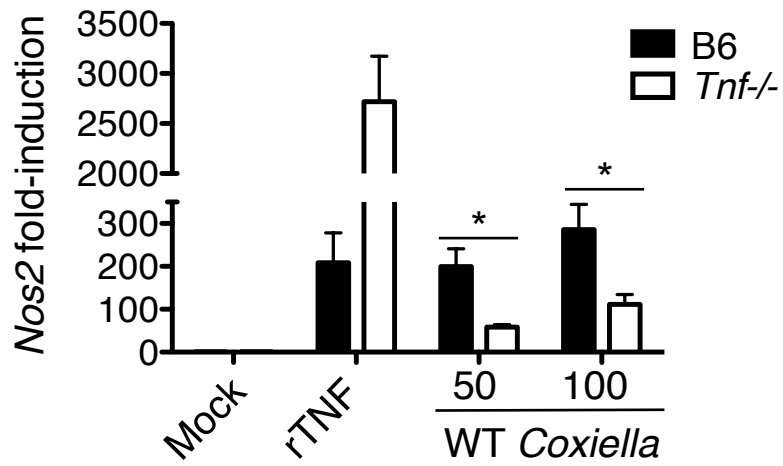

B

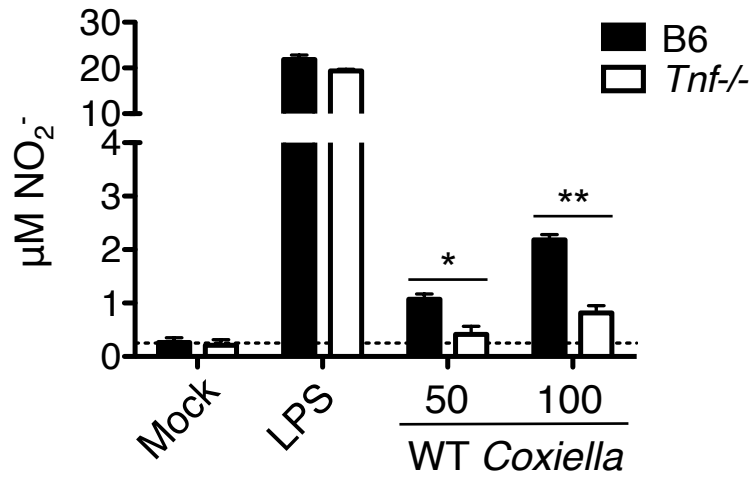

Figure S7

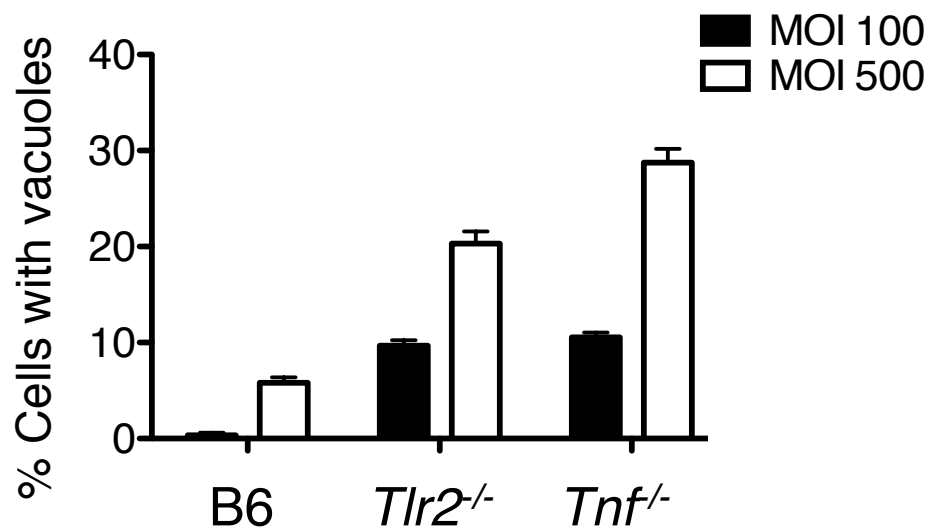

## Supplementary Figure Legends

**Figure S1: Levels of *Coxiella burnetii* Nine Mile II bacterial uptake are comparable in C57BL/6 macrophages and macrophages deficient in TLR signaling components.** (A) C57BL/6, *Tlr2*<sup>-/-</sup>, *Tlr4*<sup>-/-</sup>, and *Tlr2*<sup>-/-</sup>*Tlr4*<sup>-/-</sup> BMDMs were infected with WT *C. burnetii* NMII at MOI=100. At day 1 post-infection, the number of internalized bacteria was measured as genomic equivalents (GEs) by qPCR. (B) C57BL/6, *Trif*<sup>-/-</sup>, *Myd88*<sup>-/-</sup>, and *Myd88*<sup>-/-</sup>*Trif*<sup>-/-</sup> BMDMs were infected with WT *C. burnetii* NMII at MOI=100. At day 1 post-infection, the number of internalized bacteria was measured as genomic equivalents (GEs) by qPCR.

**Figure S2: Purified *Coxiella burnetii* Nine Mile II LPS does not elicit cytokine production from C57BL/6 macrophages.** B6 BMDMs were mock-treated or treated with 100 or 1000ng/mL purified *C. burnetii* NMII LPS or 1 or 10ng/mL purified *E. coli* LPS for 16 hours. To examine LPS antagonism, B6 BMDMs were pretreated with 100ng/mL *C. burnetii* NMII for 30 minutes LPS prior to treatment with 10ng/mL *E. coli* LPS. TNF levels were measured by ELISA. NS is not significant, \*\* is p<0.01, and \*\*\* is p<0.001 by one way ANOVA with Tukey test.

**Figure S3: *Coxiella burnetii* Nine Mile II translocates bacterial effectors into C57BL/6 macrophages in a T4SS-dependent manner.** C57BL/6 BMDMs were mock-infected, infected with BlaM-RaIF-expressing *L. pneumophila*  $\Delta$ *flaA* or  $\Delta$ *dotA* at MOI=5 or infected with BlaM-CBU\_0077-expressing WT or *icmL::Tn* *C. burnetii* NMII at MOI=5, 50, or 100 for 24 hours. Following infection, BMDMs were loaded with CCF4-AM and then subjected to flow cytometric analysis. Shown are flow cytometric plots representative of two independent experiments.

**Figure S4: *Coxiella burnetii* Nine Mile II does not induce inflammasome activation in permissive TLR2-deficient macrophages, and WT and caspase-1- and caspase-11-deficient macrophages display similar levels of bacterial uptake.** (A and B) C57BL/6 and *Tlr2*<sup>-/-</sup> BMDMs were unprimed or primed with 0.5 ug/mL LPS for 4 hours. They were then mock-infected, infected with *L. pneumophila*  $\Delta$ *flaA* at MOI=5, and infected with WT *C. burnetii* NMII at MOI=100 for 24 hours or treated with 2.5mM ATP for one hour. Levels of (A) IL-1 $\alpha$  and (B) IL-1 $\beta$  were measured in the supernatants by ELISA. Graphs show the mean  $\pm$  SEM of triplicate wells. Representative of three independent experiments. (C) C57BL/6, *Casp1*<sup>-/-</sup>*Casp11*<sup>-/-</sup>, and *Tlr2*<sup>-/-</sup> BMDMs were infected with WT *C. burnetii* NMII at MOI=100. At day 1 post-infection, the number of internalized bacteria was measured as genomic equivalents (GEs) by qPCR. Representative of two independent experiments.

**Figure S5: Levels of bacterial uptake are comparable in C57BL/6 and TNF-deficient macrophages.** (A) C57BL/6 and *Tnf*<sup>-/-</sup> BMDMs were infected with WT *C. burnetii* NMII at MOI=100. At day 1 post-infection, the number of internalized bacteria was measured as genomic equivalents (GEs) by qPCR.



**Figure S6: Induction of iNOS and nitric oxide production is decreased in TNF-deficient macrophages following *Coxiella burnetii* Nine Mile II infection.** C57BL/6 and *Tnf*<sup>-/-</sup> BMDMs were mock-infected, infected with WT *C. burnetii* NMII at MOI=50 or 100 or treated with 10ng/mL recombinant TNF (rTNF) or 0.5μg/mL LPS for 16 or 24 hours. (A) The fold-induction of *Nos2* mRNA in infected cells relative to mock-treated cells was determined by qRT-PCR at 16 hours post-infection. (B) Nitrite levels in the supernatants of infected cells were measured 24 hours post-infection by Griess assay. Representative of two independent experiments.

**Figure S7: Levels of large vacuole formation are comparable in TLR2-deficient and TNF-deficient macrophages.** B6, *Tlr2*<sup>-/-</sup>, and *Tnf*<sup>-/-</sup> BMDMs were infected with mCherry-expressing WT *C. burnetii* NMII at MOI=100 or 500. On day 7 post-infection, cells were fixed, stained with DAPI, and imaged by fluorescence microscopy. The number of mCherry-expressing *C. burnetii*-containing vacuoles was determined and calculated as a percentage of total cell number. Graphs show mean percentage of cells containing *C. burnetii* vacuoles ± SEM of triplicate coverslips. At least 300 cells were counted per coverslip. Representative of two independent experiments. \*p<0.05, \*\*p<0.01.
